# Supplementary material for: Nudging toward vaccination: a systematic review
Source: PubMed Central journal article supplement (PMC8487203; doi:10.1136/bmjgh-2021-006237), 2021-09-30
Supplement: bmjgh-2021-006237supp001.pdf [file bmjgh-2021-006237supp001.pdf]

## Supplementary Files

| Supplementary Table 1. Summary of research databases and search strings used in this review. |                |                                                                                                                                                               |
|----------------------------------------------------------------------------------------------|----------------|---------------------------------------------------------------------------------------------------------------------------------------------------------------|
|                                                                                              | Database       | Search String                                                                                                                                                 |
| 1.                                                                                           | PubMed         | (((((behavioral control) OR behavioral strategy) OR behavioral intervention) OR ((nudging) OR nudge))) AND ((vaccination) OR vaccines)) AND (decision making) |
| 2.                                                                                           | Science Direct | ("behavioral control" OR "behavioral intervention" OR "behavioral strategy" OR Nudging OR nudge) AND (vaccination OR vaccines) AND "decision making"          |
| 3.                                                                                           | ProQuest       | ((behavioral control) OR (behavioral intervention) OR (behavioral strategy) OR nudging OR nudge) AND (vaccination OR vaccine) AND (decision making)           |
| 4.                                                                                           | Ebscohost      | (behavioral control OR behavioral intervention OR behavioral strategies OR Nudging OR nudge) AND (vaccination OR vaccine) AND (decision making)               |
| 5.                                                                                           | Oxford Journal | behavioral control OR behavioral intervention OR behavioral strategy OR nudging AND vaccination AND decision making                                           |
| 6.                                                                                           | Access Science | "behavioral control" OR "behavioral intervention" OR "behavioral strategy" OR nudging OR nudge AND vaccination OR vaccine AND "decision making"               |
| 7.                                                                                           | JSTOR          | ("behavioral control" OR "behavioral intervention" OR "behavioral strategy" OR nudging OR nudge) AND (vaccination OR vaccines) AND "decision making"          |
| 8.                                                                                           | Scopus         | "behavioral control" OR "behavioral intervention" OR "behavioral strategy" OR nudging OR nudge AND vaccination OR vaccines AND "decision making"              |
| 9.                                                                                           | Google Scholar | "behavioral control" OR "behavioral intervention" OR "behavioral strategy" OR Nudging OR nudge AND vaccination OR vaccines AND "decision making"              |

| <b>Supplementary Table 2. Quality assessment results for included RCTs, 2020.</b> |                                     |           |           |           |           |
|-----------------------------------------------------------------------------------|-------------------------------------|-----------|-----------|-----------|-----------|
| <b>Included Study</b>                                                             | <b>Randomized Controlled Trials</b> |           |           |           |           |
|                                                                                   | <b>Q1</b>                           | <b>Q2</b> | <b>Q3</b> | <b>Q4</b> | <b>Q5</b> |
| Borg, et al.(47)                                                                  | 1                                   | 1         | 1         | 0         | 1         |
| Porter, et al.(63)                                                                | 1                                   | 1         | 1         | 0         | 0         |
| Saitoh, et al.(62)                                                                | 1                                   | 1         | 1         | 0         | 1         |
| Brewer, et al.(72)                                                                | 1                                   | 1         | 1         | 1         | 1         |
| Buttenheim, et al.(45)                                                            | 1                                   | 1         | 1         | 1         | 0         |
| Joseph, et al.(64)                                                                | 1                                   | 1         | 1         | 0         | 1         |
| Hendrix, et al.(82)                                                               | 1                                   | 1         | 1         | 0         | 1         |
| Nyhan, et al.(91)                                                                 | 1                                   | 1         | 1         | 1         | 1         |
| Kempe, et al.(60)                                                                 | 1                                   | 1         | 1         | 0         | 1         |
| Reiter, et al.(74)                                                                | 1                                   | 1         | 1         | 0         | 1         |
| Ahlers-Schmidt, et al.(54)                                                        | 1                                   | 1         | 1         | 0         | 1         |
| Kepka, et al.(89)                                                                 | 1                                   | 1         | 1         | 0         | 1         |
| Banerjee, et al.(70)                                                              | 1                                   | 1         | 1         | 0         | 1         |
| Bronchetti, et al.(68)                                                            | 0                                   | 1         | 1         | 0         | 0         |
| Milkman, et al.(59)                                                               | 1                                   | 1         | 1         | 1         | 1         |
| Staras, et al.(48)                                                                | 1                                   | 1         | 1         | 0         | 1         |
| Milkman, et al.(49)                                                               | 1                                   | 0         | 1         | 1         | 1         |
| Szilagyi, et al.(61)                                                              | 1                                   | 1         | 1         | 1         | 1         |
| Okuno, et al.(83)                                                                 | 1                                   | 1         | 1         | 0         | 1         |
| Motta, et al.(44)                                                                 | 1                                   | 1         | 1         | 0         | 1         |
| Schmidtke, et al.(52)                                                             | 1                                   | 1         | 1         | 0         | 1         |
| Panozzo, et al.(65)                                                               | 1                                   | 1         | 1         | 0         | 1         |
| Chen, et al.(51)                                                                  | 1                                   | 1         | 1         | 1         | 1         |
| Kuru, et al.(88)                                                                  | 1                                   | 1         | 1         | 0         | 1         |
| Freeman, et al.(78)                                                               | 1                                   | 1         | 1         | 1         | 1         |
| Cox, et al.(90)                                                                   | 1                                   | 1         | 1         | 1         | 1         |
| Frew, et al.(81)                                                                  | 1                                   | 1         | 1         | 0         | 1         |
| Maltz and Sarid(66)                                                               | 1                                   | 0         | 1         | 0         | 1         |

**Notes:**

**Q1** - Is randomization appropriately performed? ; **Q2** - Are the groups comparable at baseline? ; **Q3** - Are there complete outcome data? ; **Q4** - Are outcome assessors blinded to the intervention provided? ; **Q5** - Did the participants adhere to the assigned intervention?

Scoring: Yes: 1 point; No: 0 point; Cannot Tell: 0 point.

| <b>Supplementary Table 3. Quality assessment results for included non-RCTs, 2020.</b> |                                                      |           |           |           |           |
|---------------------------------------------------------------------------------------|------------------------------------------------------|-----------|-----------|-----------|-----------|
| <b>Included Study</b>                                                                 | <b>Quantitative Non-Randomized Controlled Trials</b> |           |           |           |           |
|                                                                                       | <b>Q1</b>                                            | <b>Q2</b> | <b>Q3</b> | <b>Q4</b> | <b>Q5</b> |
| Zeng, et al.(67)                                                                      | 1                                                    | 1         | 1         | 1         | 1         |
| Papapchrisanthou and Loman(86)                                                        | 1                                                    | 1         | 1         | 0         | 1         |
| Uddin, et al.(53)                                                                     | 1                                                    | 1         | 1         | 1         | 1         |
| Opel, et al.(71)                                                                      | 1                                                    | 1         | 1         | 1         | 1         |
| Fahy and Desmond(76)                                                                  | 1                                                    | 1         | 1         | 1         | 1         |
| Patel, et al.(55)                                                                     | 1                                                    | 1         | 1         | 1         | 1         |
| Blanchard, et al.(87)                                                                 | 0                                                    | 1         | 1         | 1         | 1         |
| Xu, et al.(80)                                                                        | 1                                                    | 0         | 1         | 1         | 1         |
| Changolkar, et al.(57)                                                                | 1                                                    | 0         | 1         | 1         | 1         |

**Notes:**

**Q1** - Is the sampling strategy relevant to address the research question? ; **Q2** – Is the sample representative of the target population?; **Q3** - Are there measurements appropriate?; **Q4** - Is the risk of nonresponse bias low?; **Q5** – Is the statistical analysis appropriate to answer the research question?

Scoring: Yes: 1 point; No: 0 point; Cannot Tell: 0 point.

**Supplementary Table 4.** Quality assessment results for included mixed-methods studies, 2020.

| Included Study          | Mixed-methods studies |    |    |    |    | Quantitative Studies |    |    |    |    | Qualitative studies |    |    |    |    |
|-------------------------|-----------------------|----|----|----|----|----------------------|----|----|----|----|---------------------|----|----|----|----|
|                         | Q1                    | Q2 | Q3 | Q4 | Q5 | Q1                   | Q2 | Q3 | Q4 | Q5 | Q1                  | Q2 | Q3 | Q4 | Q5 |
| Lee, et al.(84)         | 1                     | 1  | 1  | 0  | 1  | 0                    | 1  | 0  | 0  | 1  | 1                   | 1  | 1  | 0  | 0  |
| Schoeppe, et al.(75)    | 1                     | 1  | 1  | 0  | 0  | 1                    | 1  | 1  | 1  | 1  | 1                   | 1  | 1  | 1  | 1  |
| Attwell and Freeman(85) | 1                     | 1  | 1  | 1  | 0  | 1                    | 1  | 1  | 1  | 1  | 1                   | 1  | 1  | 1  | 1  |
| Lechuga, et al.(77)     | 1                     | 0  | 0  | 1  | 0  | 1                    | 1  | 1  | 1  | 1  | 1                   | 0  | 0  | 1  | 1  |
| Lorini, et al.(50)      | 1                     | 0  | 1  | 0  | 1  | 1                    | 1  | 1  | 1  | 1  | 1                   | 1  | 1  | 1  | 1  |

**Notes:**

**Mixed-methods:** **Q1** - Is there adequate rationale for using a mixed methods design to address the research question? ; **Q2** - Are the different components of the study effectively integrated to answer the research question?; **Q3** - Are the outputs of the integration of qualitative and quantitative components adequately interpreted?; **Q4** - Are divergences and inconsistencies between quantitative and qualitative results adequately addressed?; **Q5** - Do the different components of the study adhere to the quality of criteria of each tradition of the methods involved?

**Quantitative studies:** **Q1** - Is the sampling strategy relevant to address the research question? ; **Q2** - Is the sample representative of the target population?; **Q3** - Are there measurements appropriate?; **Q4** - Is the risk of nonresponse bias low?; **Q5** - Is the statistical analysis appropriate to answer the research question?

**Qualitative studies:** **Q1** Is the qualitative approach appropriate to answer the research question? ; **Q2** - Are the qualitative data collection methods adequate to address the research question?; **Q3** - Are the findings adequately derived from the data?; **Q4** - Is the interpretation of results sufficiently substantiated by data?; **Q5** - Is there coherence between qualitative data sources, collection, analysis and interpretation?

Scoring: Yes: 1 point; No: 0 point; Cannot Tell: 0 point.

**Supplementary Table 5.** Quality assessment results for included quantitative descriptive studies, 2020.

| Included Study        | Quantitative Descriptive Studies |    |    |    |    |
|-----------------------|----------------------------------|----|----|----|----|
|                       | Q1                               | Q2 | Q3 | Q4 | Q5 |
| Duvall(58)            | 1                                | 1  | 1  | 1  | 1  |
| Giubilini, et al.(73) | 1                                | 1  | 1  | 0  | 1  |
| Liu, et al.(79)       | 1                                | 1  | 1  | 1  | 1  |
| Kim, et al.(56)       | 1                                | 1  | 1  | 1  | 1  |

**Notes:**

**Q1** - Is the sampling strategy relevant to address the research question? ; **Q2** - Is the sample representative of the target population?; **Q3** - Are there measurements appropriate?; **Q4** - Is the risk of nonresponse bias low?; **Q5** - Is the statistical analysis appropriate to answer the research question?

Scoring: Yes: 1 point; No: 0 point; Cannot Tell: 0 point.

| <b>Supplementary Table 6. Quality assessment results for included qualitative studies, 2020.</b> |                            |           |           |           |           |
|--------------------------------------------------------------------------------------------------|----------------------------|-----------|-----------|-----------|-----------|
| <b>Included Study</b>                                                                            | <b>Qualitative Studies</b> |           |           |           |           |
|                                                                                                  | <b>Q1</b>                  | <b>Q2</b> | <b>Q3</b> | <b>Q4</b> | <b>Q5</b> |
| Lwembe, et al.(46)                                                                               | 1                          | 1         | 1         | 1         | 1         |
| Rockliffe, et al.(69)                                                                            | 1                          | 1         | 1         | 1         | 1         |

**Notes:**

**Q1** - Is the qualitative approach appropriate to answer the research question? ; **Q2** - Are the qualitative data collection methods adequate to address the research question?; **Q3** - Are the findings adequately derived from the data?; **Q4** - Is the interpretation of results sufficiently substantiated by data?; **Q5** – Is there coherence between qualitative data sources, collection, analysis and interpretation?

Scoring: Yes: 1 point; No: 0 point; Cannot Tell: 0 point.

| Supplementary Table 7. GRADE evidence profile for 25 randomized controlled trials included in this review. |                                                                                                                                                                |                          |                         |                                                                                    |                                                                                             |                 |
|------------------------------------------------------------------------------------------------------------|----------------------------------------------------------------------------------------------------------------------------------------------------------------|--------------------------|-------------------------|------------------------------------------------------------------------------------|---------------------------------------------------------------------------------------------|-----------------|
| Study                                                                                                      | Quality assessment of evidence                                                                                                                                 |                          |                         |                                                                                    |                                                                                             |                 |
|                                                                                                            | Limitation                                                                                                                                                     | Inconsistency            | Indirectness            | Imprecision                                                                        | Risk of bias                                                                                | Quality grading |
| Borg, et al.(47)                                                                                           | No serious limitation                                                                                                                                          | No serious inconsistency | No serious indirectness | No serious imprecision                                                             | None detected                                                                               | ⊕⊕⊕⊕ High       |
| Porter, et al.(63)                                                                                         | Serious limitation (the trial was conducted via online, hence there is no confirmation if participants read the intervention)                                  | No serious inconsistency | No serious indirectness | No serious imprecision                                                             | Very serious risk of bias (presence of information bias; large losses to follow-up)         | ⊕○○○ Very low   |
| Saitoh, et al.(62)                                                                                         | Serious limitation (there was an increased public awareness before the start of recruitment and participant enrollment that may have influenced study results) | No serious inconsistency | No serious indirectness | No serious imprecision                                                             | Very serious risk of bias (methods of blinding not mentioned; presence of information bias) | ⊕○○○ Very low   |
| Brewer NT, et al.(72)                                                                                      | No serious limitation                                                                                                                                          | No serious inconsistency | No serious indirectness | No serious imprecision                                                             | None detected                                                                               | ⊕⊕⊕⊕ High       |
| Buttenheim, et al.(45)                                                                                     | Very serious limitation (no report of sample size calculation; no confirmation of utilization of intervention)                                                 | No serious inconsistency | No serious indirectness | No serious imprecision                                                             | None detected                                                                               | ⊕⊕○○ Low        |
| Joseph, et al.(64)                                                                                         | No serious limitation                                                                                                                                          | No serious inconsistency | No serious indirectness | Serious imprecision (sample size was not powered to detect significant difference) | Serious risk of bias (methods of blinding not mentioned)                                    | ⊕⊕○○ Low        |
| Hendrix, et al.(82)                                                                                        | No serious limitation                                                                                                                                          | No serious inconsistency | No serious indirectness | No serious imprecision                                                             | Serious risk of bias (methods of blinding not mentioned)                                    | ⊕⊕⊕○ Moderate   |
| Nyhan, et al.(91)                                                                                          | No serious limitation                                                                                                                                          | No serious inconsistency | No serious indirectness | No serious imprecision                                                             | None detected                                                                               | ⊕⊕⊕⊕ High       |
| Kempe, et al.(60)                                                                                          | No serious limitation                                                                                                                                          | No serious inconsistency | No serious indirectness | No serious imprecision                                                             | Serious risk of bias (methods of blinding not mentioned)                                    | ⊕⊕⊕○ Moderate   |
| Reiter, et al.(74)                                                                                         | Serious limitation (sample size calculation was unclear)                                                                                                       | No serious inconsistency | No serious indirectness | No serious imprecision                                                             | Serious risk of bias (methods of blinding not mentioned)                                    | ⊕⊕○○ Low        |
| Ahlers-Schmidt, et al.(54)                                                                                 | Serious limitation (sample size calculation was unclear)                                                                                                       | No serious inconsistency | No serious indirectness | Serious imprecision (sample size was not powered to                                | Serious risk of bias (large losses to follow-up; methods of                                 | ⊕○○○ Very low   |

| Supplementary Table 7. GRADE evidence profile for 25 randomized controlled trials included in this review. |                                                                |                                                                                |                         |                                |                                                                                           |                 |
|------------------------------------------------------------------------------------------------------------|----------------------------------------------------------------|--------------------------------------------------------------------------------|-------------------------|--------------------------------|-------------------------------------------------------------------------------------------|-----------------|
| Study                                                                                                      | Quality assessment of evidence                                 |                                                                                |                         |                                |                                                                                           |                 |
|                                                                                                            | Limitation                                                     | Inconsistency                                                                  | Indirectness            | Imprecision                    | Risk of bias                                                                              | Quality grading |
|                                                                                                            |                                                                |                                                                                |                         | detect significant difference) | blinding not mentioned)                                                                   |                 |
| Kepka, et al.(89)                                                                                          | Serious limitation (sample size calculation was unclear)       | No serious inconsistency                                                       | No serious indirectness | No serious imprecision         | Very serious risk of bias (presence of selection bias; methods of blinding not mentioned) | ⊕○○○ Very low   |
| Banerjee, et al.(70)                                                                                       | Serious limitation (sample size calculation was not mentioned) | No serious inconsistency                                                       | No serious indirectness | No serious imprecision         | Very serious risk of bias (large losses to follow-up; lack of blinding)                   | ⊕○○○ Very low   |
| Bronchetti, et al.(68)                                                                                     | Serious limitation (sample size calculation was not mentioned) | Serious inconsistency (the allocation of intervention and control was unclear) | No serious indirectness | No serious imprecision         | Serious risk of bias (methods of blinding not mentioned)                                  | ⊕○○○ Very low   |
| Milkman, et al.(59)                                                                                        | Serious limitation (sample size calculation was not mentioned) | No serious inconsistency                                                       | No serious indirectness | No serious imprecision         | None detected                                                                             | ⊕⊕⊕○ Moderate   |
| Staras, et al.(48)                                                                                         | No serious limitation                                          | No serious inconsistency                                                       | No serious indirectness | No serious imprecision         | Serious risk of bias (methods of blinding not mentioned)                                  | ⊕⊕⊕○ Moderate   |
| Milkman, et al.(49)                                                                                        | No serious limitation                                          | No serious inconsistency                                                       | No serious indirectness | No serious imprecision         | None detected                                                                             | ⊕⊕⊕⊕ High       |
| Szilagyi, et al.(61)                                                                                       | No serious limitation                                          | No serious inconsistency                                                       | No serious indirectness | No serious imprecision         | None detected                                                                             | ⊕⊕⊕⊕ High       |
| Okuno, et al.(83)                                                                                          | Serious limitation (sample size calculation was not mentioned) | No serious inconsistency                                                       | No serious indirectness | No serious imprecision         | None detected                                                                             | ⊕⊕⊕○ Moderate   |
| Motta, et al.(44)                                                                                          | No serious limitation                                          | No serious inconsistency                                                       | No serious indirectness | No serious imprecision         | Serious risk of bias (methods of blinding not mentioned)                                  | ⊕⊕⊕○ Moderate   |
| Schmidtke, et al.(52)                                                                                      | No serious limitation                                          | No serious inconsistency                                                       | No serious indirectness | No serious imprecision         | None detected                                                                             | ⊕⊕⊕⊕ High       |
| Panozzo, et al.(65)                                                                                        | No serious limitation                                          | No serious inconsistency                                                       | No serious indirectness | No serious imprecision         | Serious risk of bias (large losses to follow-up)                                          | ⊕⊕⊕○ Moderate   |
| Chen, et al.(51)                                                                                           | No serious limitation                                          | No serious inconsistency                                                       | No serious indirectness | No serious imprecision         | None detected                                                                             | ⊕⊕⊕⊕ High       |
| Kuru, et al.(88)                                                                                           | No serious limitation                                          | No serious inconsistency                                                       | No serious indirectness | No serious imprecision         | Serious risk of bias (methods of blinding not mentioned)                                  | ⊕⊕⊕○ Moderate   |
| Freeman, et al.(78)                                                                                        | No serious limitation                                          | No serious inconsistency                                                       | No serious indirectness | No serious imprecision         | None detected                                                                             | ⊕⊕⊕⊕ High       |

| Supplementary Table 7. GRADE evidence profile for 25 randomized controlled trials included in this review. |                                |                          |                         |                        |                                                          |                 |
|------------------------------------------------------------------------------------------------------------|--------------------------------|--------------------------|-------------------------|------------------------|----------------------------------------------------------|-----------------|
| Study                                                                                                      | Quality assessment of evidence |                          |                         |                        |                                                          |                 |
|                                                                                                            | Limitation                     | Inconsistency            | Indirectness            | Imprecision            | Risk of bias                                             | Quality grading |
| Cox, et al.(90)                                                                                            | No serious limitation          | No serious inconsistency | No serious indirectness | No serious imprecision | None detected                                            | ⊕⊕⊕⊕ High       |
| Frew, et al.(81)                                                                                           | No serious limitation          | No serious inconsistency | No serious indirectness | No serious imprecision | Serious risk of bias (methods of blinding not mentioned) | ⊕⊕⊕○ Moderate   |
| Maltz and Sarid(66)                                                                                        | No serious limitation          | No serious inconsistency | No serious indirectness | No serious imprecision | Serious risk of bias (methods of blinding not mentioned) | ⊕⊕⊕○ Moderate   |
